# Supplementary material for: The impact of nuts consumption on glucose/insulin homeostasis and inflammation markers mediated by adiposity factors among American adults
Source: PubMed Central journal article supplement (PMC6101284; doi:10.18632/oncotarget.25168), 2018-07-27
Supplement: oncotarget-09-31173-s001.pdf [file oncotarget-09-31173-s001.pdf]

## The impact of nuts consumption on glucose/insulin homeostasis and inflammation markers mediated by adiposity factors among american adults

### SUPPLEMENTARY MATERIALS

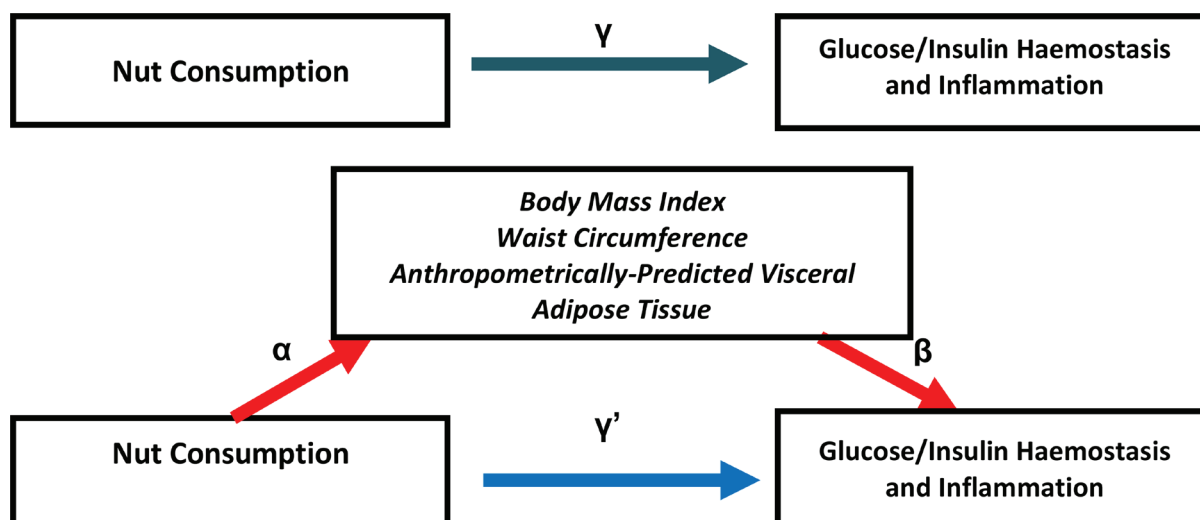

**Supplementary Figure 1: Mediation model for the association between nut consumption, glucose/insulin homeostasis and inflammation with body mass index (BMI), waist circumference (WC) and anthropometrically-predicted visceral adipose tissue (apVAT), lipid accumulation product (LAP) and visceral adiposity index (VAI) as mediators.** Path  $\alpha$  represents the regression coefficient for the association of nut consumption with BMI, WC, apVAT, LAP and VAI. Path  $\beta$  represents the regression coefficient for the association of BMI, WC, apVAT and VAI with glucose/insulin homeostasis and inflammation. The product of regression coefficients  $\alpha$  and  $\beta$  represents the mediated effect (indirect effect) of BMI, WC, apVAT, LAP or VAI ( $\alpha\beta$ ). Path  $\gamma$ , represents the direct effect of nut consumption with glucose/insulin homeostasis and inflammation, after adjustment for BMI, WC, apVAT, LAP or VAI. Path  $\gamma'$  represents the simple total effect of nut consumption on glucose/insulin homeostasis and inflammation, without adjustment for BMI, WC, apVAT, LAP or VAI.
